# Supplementary material
Source: PubMed Central journal article supplement (PMC4463790)
Supplement: brc-0010-0109-s02.pdf [file brc-0010-0109-s02.pdf]

**Table 2.** 1-arm trials using irradiation and hyperthermia for the treatment of breast cancer. Results and toxicity of the combined treatment are presented

| Study [ref.]                  | Tumor site                                                 | Pat./lesions, n                          | Treatment                                         | Results                                                                                                                                                                                                      | Toxicity of HT                                                                                                                                           |
|-------------------------------|------------------------------------------------------------|------------------------------------------|---------------------------------------------------|--------------------------------------------------------------------------------------------------------------------------------------------------------------------------------------------------------------|----------------------------------------------------------------------------------------------------------------------------------------------------------|
| Dragovic et al. [20]          | locally recurrent breast carcinoma                         | 30 pat.                                  | Low-dose RT + HT                                  | CR 57%<br>PR 36%                                                                                                                                                                                             | N.A.                                                                                                                                                     |
| Dubois et al. [21]            | chest wall recurrences from breast cancer                  | 42 pat.                                  | RT + HT (34 pat.)<br>CT + HT (4 pat.) HT (4 pat.) | CR 52.3%<br>PR 26.1%<br>NR 21.4%<br><i>for RTHT:</i><br>CR 64.7%<br>PR 17.5%<br>NR 17.6%                                                                                                                     | phlyctenae (11.9%)<br>dry erythematous epidermitis with no desquamation (9.5%)<br>no late skin reactions                                                 |
| Phromratanapongse et al. [22] | locally recurrent adenocarcinoma of breast                 | 44 pat.                                  | RT + HT                                           | follow up 1 month<br>CR 41%<br>PR 23%<br>NR 36%<br>follow up > 12 months<br>27.5%                                                                                                                            | thermal blisters (24%)<br>pain during HT (25%)<br>catheter-related infection (2.3%)<br>ulcerated infections (4.5%)                                       |
| Engin et al. [23]             | recurrences on the chest wall of advanced breast carcinoma | 20 pat.                                  | RT + HT                                           | CR 95%                                                                                                                                                                                                       | erythema (60%)<br>thermal blistering (50%)<br>ulceration (20%)                                                                                           |
| Lindholm et al. [24]          | superficial recurrent breast carcinoma                     | 59/81                                    | RT + HT                                           | CR 71%<br>PR 29%                                                                                                                                                                                             | pain<br>minimal erythema (49%)<br>erythema with slight desquamation (19%)<br>severe skin damage (desquamation with blisters, necrosis/ulceration) (32%)  |
| Lee et al. [25]               | recurrent breast carcinoma of the chest wall               | 151/196 (179 measurable, 17 microscopic) | RT + HT                                           | after completion of therapy<br>CR 39%<br>PR 32%<br>SD 49%<br>at the time of maximum regression<br>CR 63%<br>PR 19%<br>SD 16%<br><i>local control</i><br>1 year 53%<br>2 year 42%<br>3 year 33%<br>4 year 22% | acute adverse effects: erythema, dry desquamation, moist desquamation, thermal blisters (27%)<br>long-term effects: persistent ulceration/necrosis (17%) |
| Van der Zee et al. [26]       | recurrent breast cancer                                    | 134/134 fields                           | reRT + HT                                         | CR 71% (macroscopic disease)<br>LC 73% (including microscopic disease)<br><i>433 MHz/2,450 MHz:</i><br>CR 74/58%<br>LC 76/63%                                                                                | thermal burns<br>ulceration (3.7%)                                                                                                                       |

**Table 2. Continued**

| Study [ref.]           | Tumor site                                                          | Pat./lesions, n                                                                                                        | Treatment                                                                             | Results                                                                                                              | Toxicity of HT                                                                                                                                                               |
|------------------------|---------------------------------------------------------------------|------------------------------------------------------------------------------------------------------------------------|---------------------------------------------------------------------------------------|----------------------------------------------------------------------------------------------------------------------|------------------------------------------------------------------------------------------------------------------------------------------------------------------------------|
| Myerson et al. [27]    | superficial tumors including breast cancer                          | 44/47<br>15 lesions of chest wall or breast carcinoma                                                                  | RT + HT                                                                               | CR 79%<br>PR 14%<br>NR 7%                                                                                            | soft tissue ulceration (21%)<br>transitory diminution of the left eye blink reflex (2.1%)<br>bilateral pleural effusion (2.1%)                                               |
| Feyerabend et al. [28] | inoperable recurrent breast cancer                                  | 25 pat.                                                                                                                | RT + CT + HT                                                                          | response rate 80%<br>CR 44%                                                                                          | acute skin reactions > grade 2: 16%<br>discomfort during HT treatment (most pat.)                                                                                            |
| Hehr et al. [29]       | locally recurrent breast cancer                                     | 39 pat.                                                                                                                | RT + HT                                                                               | 1-year survival 71%<br>2-year survival 54%<br>LC 53%                                                                 | erythema (28%)<br>dry/moist desquamation (31/31%)<br>small subcutaneous blisters (20.5%)<br>soft tissue necrosis (7.7%)                                                      |
| Kouloulis et al. [30]  | superficial carcinomas including breast cancer                      | 88 postmastectomy relapses in front chest wall from breast cancer<br>27 supraclavicular lymph nodes from breast cancer | RT + HT                                                                               | postmastectomy relapses<br>CR 85.2%<br>supraclavicular lymph nodes<br>CR 70.4%                                       | grade 3 skin reaction in postmastectomy relapses (6.8%)                                                                                                                      |
| Kouloulis et al. [31]  | locally recurrent breast cancer                                     | 15 pat.                                                                                                                | RT + CT + HT                                                                          | CR 20%<br>PR 80%                                                                                                     | moist desquamation with blisters and skin burns (6.7%)                                                                                                                       |
| Ben Yosef et al. [32]  | locally recurrent breast cancer                                     | 15/28 HT fields                                                                                                        | RT + HT                                                                               | CR 40%<br>PR 26.7%<br>NR/PD 20%                                                                                      | ulceration (20%)                                                                                                                                                             |
| Li et al. [33]         | locoregional recurrent breast carcinoma                             | 73/85 + (47/55)                                                                                                        | (re) RT + HT                                                                          | CR 56% (re-irradiation)<br>CR 47% (irradiation)                                                                      | skin ulceration (14%)                                                                                                                                                        |
| Welz et al. [34]       | locally advanced or recurrent breast cancer with marginal resection | 50 pat.:<br>group1: 13 pat.<br>group2: 37 pat.                                                                         | group1: RTHt after resection as primary therapy<br>group 2: RTHt for recurrent tumors | local control 80%<br>DFS 68%                                                                                         | acute skin toxicity:<br>grade I 37%<br>grade II 12%<br>grade III 16%<br>grade IV 0%<br>cutaneous blisters: 14%                                                               |
| Gabriele et al. [35]   | superficial tumors including breast recurrences on chest wall       | 23/44                                                                                                                  | reRT + HT                                                                             | follow up at 45 days<br>CR 65.9%<br>PR 29.5%<br>NR 4.5%<br>follow up at 18 months<br>LC 72.7%<br>SD 20.5%<br>NC 6.8% | non-serious acute reactions:<br>grade ≤ 2 100%<br>grade >2 0%                                                                                                                |
| Oldenborg et al. [36]  | locoregional recurrences of breast cancer                           | 78 pat.                                                                                                                | reRT + HT                                                                             | 3-year LC 78%<br>5-year LC 65%                                                                                       | pain/discomfort: 41%<br>blisters (< grade 3): 23%<br>fat necrosis (< grade 3): 4%<br>acute grade 3 toxicity (mainly moist desquamation): 32%<br>late grade 3–4 toxicity: 43% |

**Table 2.** *Continued*

| Study [ref.]          | Tumor site                           | Pat./lesions, n | Treatment    | Results                        | Toxicity of HT                                                                           |
|-----------------------|--------------------------------------|-----------------|--------------|--------------------------------|------------------------------------------------------------------------------------------|
| Yamamoto et al. [37]  | local recurrent breast cancer        | 1 patient       | RT + CT + HT | complete response              | -                                                                                        |
| Linthorst et al. [38] | locoregional recurrent breast cancer | 198 pat.        | RT + HT      | 3-year LC 83%<br>5-year LC 78% | grade 3 acute toxicity (2.5%)<br>abscess (1%)<br>grade 3-4 late toxicity 5 years (11.9%) |

RT = Radiotherapy; CT = chemotherapy; HT = hyperthermia; RTHT = RT + HT; CR = complete response; PR = partial response; NR = non-response; LC = local control; SD = standard disease; NC = non-control; PD = progressive disease; DFS = disease-free survival; N.A. = not available.
